# Supplementary material
Source: MDPI journal article supplement (https://www.mdpi.com/2071-1050/14/24/17052)
Supplement: s1 [file s1]

## Supplementary Materials

Assessment of uncertainty associated with statistical modeling of precipitation extremes for hydrologic engineering applications in Amman, Jordan”

By Mohamad N. Ibrahim

Table S1 The results of 10000 bootstrap samples summary statistics characteristics (i.e., the average, standard deviation (SD), Coefficient of Variation (CV), skewness, and kurtosis) and their standard deviation for different record lengths for station 17.

| Record length  | Average |         | Standard Deviation (SD) |         | Coefficient of Variation (CV) |         | Skewness |         | Kurtosis |         |
|----------------|---------|---------|-------------------------|---------|-------------------------------|---------|----------|---------|----------|---------|
|                | Average | SD      | Average                 | SD      | Average                       | SD      | Average  | SD      | Average  | SD      |
| 10             | 72.291  | 8.749   | 26.696                  | 6.901   | 0.369                         | 0.084   | 0.373    | 0.578   | 2.484    | 0.891   |
| 15             | 72.259  | 7.130   | 26.968                  | 5.603   | 0.373                         | 0.068   | 0.480    | 0.518   | 2.742    | 1.015   |
| 20             | 72.227  | 6.254   | 27.085                  | 4.851   | 0.375                         | 0.059   | 0.537    | 0.464   | 2.884    | 1.017   |
| 30             | 72.191  | 5.074   | 27.277                  | 3.959   | 0.378                         | 0.048   | 0.610    | 0.386   | 3.064    | 0.942   |
| 40             | 72.147  | 4.411   | 27.348                  | 3.409   | 0.379                         | 0.041   | 0.645    | 0.340   | 3.168    | 0.878   |
| 50             | 72.121  | 3.936   | 27.400                  | 3.047   | 0.380                         | 0.037   | 0.666    | 0.305   | 3.230    | 0.795   |
| 75             | 72.095  | 3.213   | 27.473                  | 2.503   | 0.381                         | 0.031   | 0.692    | 0.245   | 3.296    | 0.654   |
| 80             | 72.098  | 3.097   | 27.485                  | 2.403   | 0.381                         | 0.029   | 0.696    | 0.236   | 3.306    | 0.636   |
| 90             | 72.096  | 2.918   | 27.486                  | 2.272   | 0.381                         | 0.028   | 0.701    | 0.221   | 3.318    | 0.593   |
| 100            | 72.098  | 2.761   | 27.498                  | 2.141   | 0.381                         | 0.026   | 0.705    | 0.208   | 3.330    | 0.561   |
| 150            | 72.101  | 2.263   | 27.527                  | 1.753   | 0.382                         | 0.021   | 0.718    | 0.169   | 3.360    | 0.453   |
| 200            | 72.113  | 1.951   | 27.546                  | 1.508   | 0.382                         | 0.018   | 0.724    | 0.145   | 3.376    | 0.394   |
| 500            | 72.074  | 1.234   | 27.557                  | 0.954   | 0.382                         | 0.012   | 0.736    | 0.092   | 3.407    | 0.247   |
| Max            | 72.291  | 8.749   | 27.557                  | 6.901   | 0.382                         | 0.084   | 0.736    | 0.578   | 3.407    | 1.017   |
| Min            | 72.074  | 1.234   | 26.696                  | 0.954   | 0.369                         | 0.012   | 0.373    | 0.092   | 2.484    | 0.247   |
| Percent change | 0.301   | 608.945 | 3.223                   | 623.025 | 3.561                         | 619.277 | 97.616   | 530.432 | 37.139   | 311.500 |

Observed data summary statistics characteristics for station 17 are: average = 72.086, SD = 27.779, CV = 0.385, skewness = 0.743, and kurtosis = 3.421.

Table S2 The results of 10000 bootstrap samples summary statistics characteristics (i.e., the average, standard deviation (SD), Coefficient of Variation (CV), skewness, and kurtosis) and their standard deviation for different record lengths for station 19.

| Record length  | Average |         | Standard Deviation (SD) |         | Coefficient of Variation (CV) |         | Skewness |         | Kurtosis |         |
|----------------|---------|---------|-------------------------|---------|-------------------------------|---------|----------|---------|----------|---------|
|                | Average | SD      | Average                 | SD      | Average                       | SD      | Average  | SD      | Average  | SD      |
| 10             | 38.094  | 4.650   | 14.141                  | 4.267   | 0.369                         | 0.093   | 0.583    | 0.621   | 2.797    | 1.079   |
| 15             | 38.122  | 3.801   | 14.393                  | 3.452   | 0.376                         | 0.075   | 0.736    | 0.575   | 3.221    | 1.323   |
| 20             | 38.110  | 3.288   | 14.509                  | 2.987   | 0.379                         | 0.065   | 0.822    | 0.522   | 3.479    | 1.374   |
| 30             | 38.079  | 2.700   | 14.609                  | 2.409   | 0.383                         | 0.052   | 0.914    | 0.434   | 3.764    | 1.277   |
| 40             | 38.077  | 2.352   | 14.654                  | 2.089   | 0.384                         | 0.045   | 0.958    | 0.372   | 3.899    | 1.159   |
| 50             | 38.060  | 2.086   | 14.683                  | 1.860   | 0.385                         | 0.040   | 0.984    | 0.322   | 3.978    | 1.029   |
| 75             | 38.082  | 1.699   | 14.723                  | 1.507   | 0.386                         | 0.033   | 1.011    | 0.252   | 4.057    | 0.829   |
| 80             | 38.079  | 1.657   | 14.722                  | 1.462   | 0.386                         | 0.032   | 1.014    | 0.245   | 4.061    | 0.801   |
| 90             | 38.078  | 1.555   | 14.732                  | 1.370   | 0.387                         | 0.030   | 1.021    | 0.226   | 4.080    | 0.747   |
| 100            | 38.076  | 1.471   | 14.744                  | 1.305   | 0.387                         | 0.028   | 1.026    | 0.213   | 4.090    | 0.704   |
| 150            | 38.072  | 1.201   | 14.764                  | 1.069   | 0.388                         | 0.023   | 1.039    | 0.172   | 4.122    | 0.571   |
| 200            | 38.074  | 1.048   | 14.766                  | 0.928   | 0.388                         | 0.020   | 1.045    | 0.147   | 4.134    | 0.485   |
| 500            | 38.069  | 0.667   | 14.780                  | 0.584   | 0.388                         | 0.013   | 1.055    | 0.091   | 4.157    | 0.303   |
| Max            | 38.122  | 4.650   | 14.780                  | 4.267   | 0.388                         | 0.093   | 1.055    | 0.621   | 4.157    | 1.374   |
| Min            | 38.060  | 0.667   | 14.141                  | 0.584   | 0.369                         | 0.013   | 0.583    | 0.091   | 2.797    | 0.303   |
| Percent change | 0.163   | 596.632 | 4.516                   | 630.181 | 5.288                         | 647.379 | 81.018   | 579.650 | 48.613   | 354.208 |

Observed data summary statistics characteristics for station 19 are: average = 38.062, SD = 14.884, CV = 0.391, skewness = 1.062, and kurtosis = 4.17.

Table S3 The results of 10000 bootstrap samples summary statistics characteristics (i.e., the average, standard deviation (SD), Coefficient of Variation (CV), skewness, and kurtosis) and their standard deviation for different record lengths for station 22.

| Record length  | Average |         | Standard Deviation (SD) |         | Coefficient of Variation (CV) |         | Skewness |         | Kurtosis |         |
|----------------|---------|---------|-------------------------|---------|-------------------------------|---------|----------|---------|----------|---------|
|                | Average | SD      | Average                 | SD      | Average                       | SD      | Average  | SD      | Average  | SD      |
| 10             | 59.855  | 8.468   | 25.509                  | 7.865   | 0.422                         | 0.105   | 0.722    | 0.604   | 2.902    | 1.168   |
| 15             | 59.805  | 6.870   | 25.882                  | 6.357   | 0.430                         | 0.084   | 0.888    | 0.545   | 3.358    | 1.407   |
| 20             | 59.771  | 5.977   | 26.056                  | 5.474   | 0.434                         | 0.072   | 0.974    | 0.494   | 3.627    | 1.460   |
| 30             | 59.790  | 4.823   | 26.226                  | 4.450   | 0.437                         | 0.058   | 1.050    | 0.399   | 3.858    | 1.317   |
| 40             | 59.779  | 4.185   | 26.317                  | 3.790   | 0.439                         | 0.049   | 1.093    | 0.341   | 3.995    | 1.178   |
| 50             | 59.801  | 3.735   | 26.395                  | 3.393   | 0.441                         | 0.044   | 1.114    | 0.297   | 4.048    | 1.049   |
| 75             | 59.808  | 3.057   | 26.471                  | 2.731   | 0.442                         | 0.036   | 1.137    | 0.236   | 4.101    | 0.829   |
| 80             | 59.802  | 2.966   | 26.477                  | 2.647   | 0.442                         | 0.034   | 1.142    | 0.229   | 4.115    | 0.819   |
| 90             | 59.796  | 2.782   | 26.486                  | 2.498   | 0.443                         | 0.032   | 1.145    | 0.214   | 4.120    | 0.760   |
| 100            | 59.801  | 2.651   | 26.492                  | 2.357   | 0.443                         | 0.031   | 1.150    | 0.203   | 4.132    | 0.723   |
| 150            | 59.821  | 2.163   | 26.538                  | 1.924   | 0.443                         | 0.025   | 1.158    | 0.162   | 4.140    | 0.577   |
| 200            | 59.808  | 1.867   | 26.548                  | 1.664   | 0.444                         | 0.022   | 1.164    | 0.138   | 4.150    | 0.496   |
| 500            | 59.846  | 1.189   | 26.616                  | 1.050   | 0.445                         | 0.013   | 1.170    | 0.087   | 4.151    | 0.309   |
| Max            | 59.855  | 8.468   | 26.616                  | 7.865   | 0.445                         | 0.105   | 1.170    | 0.604   | 4.151    | 1.460   |
| Min            | 59.771  | 1.189   | 25.509                  | 1.050   | 0.422                         | 0.013   | 0.722    | 0.087   | 2.902    | 0.309   |
| Percent change | 0.141   | 612.346 | 4.341                   | 648.785 | 5.339                         | 676.415 | 62.024   | 597.680 | 43.057   | 372.110 |

Observed data summary statistics characteristics for station 22 are: average = 59.841, SD = 26.816, CV = 0.448, skewness = 1.175, and kurtosis = 4.158.

**(a)  $T = 5$  years**

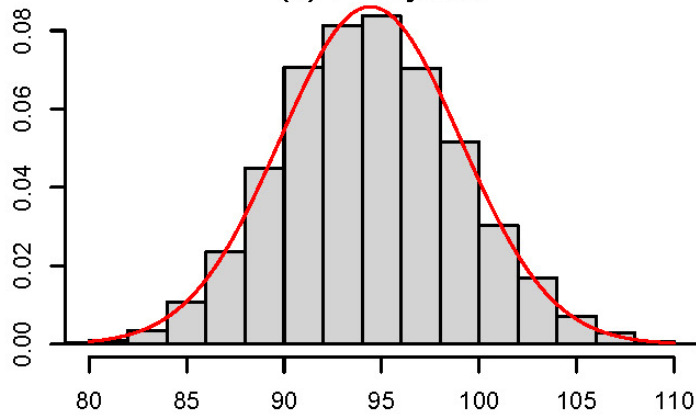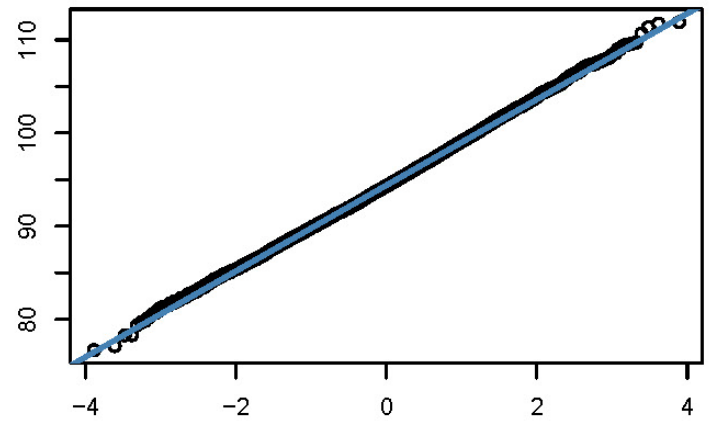

**(b)  $T = 50$  years**

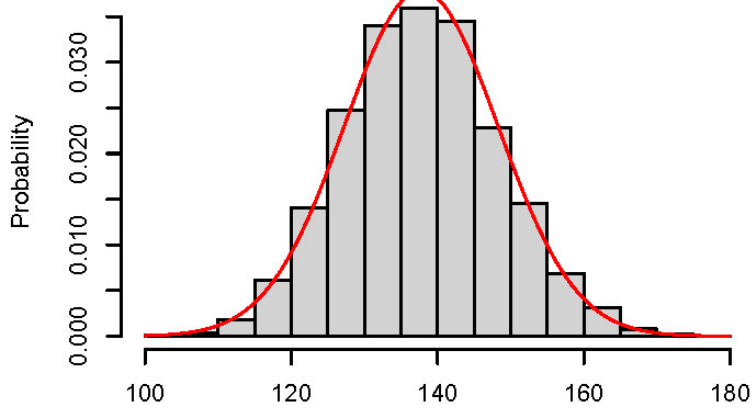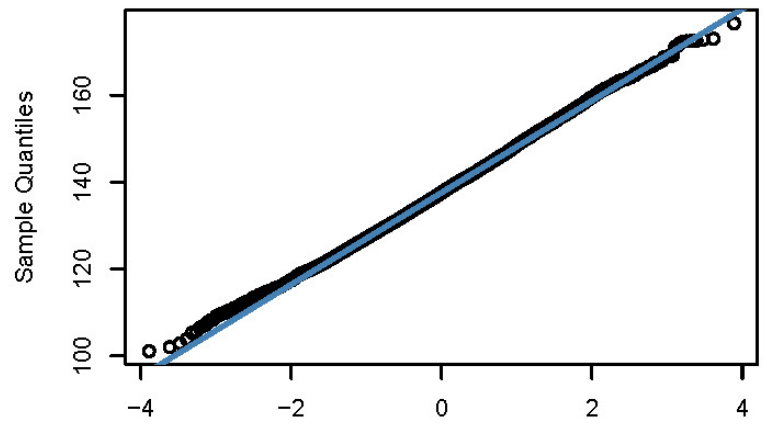

**(c)  $T = 100$  years**

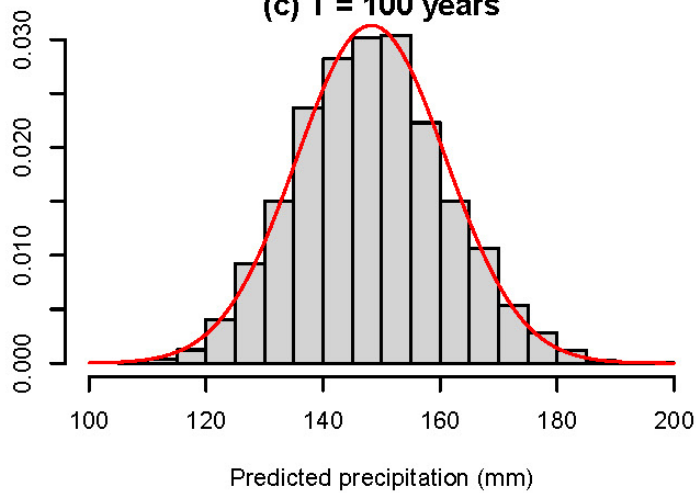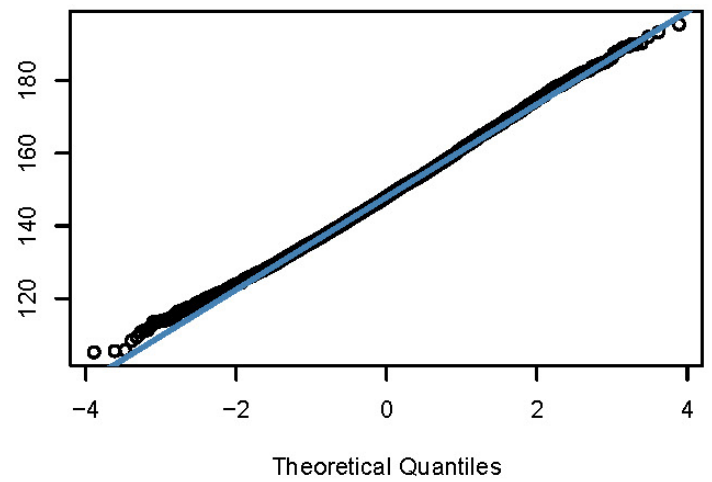

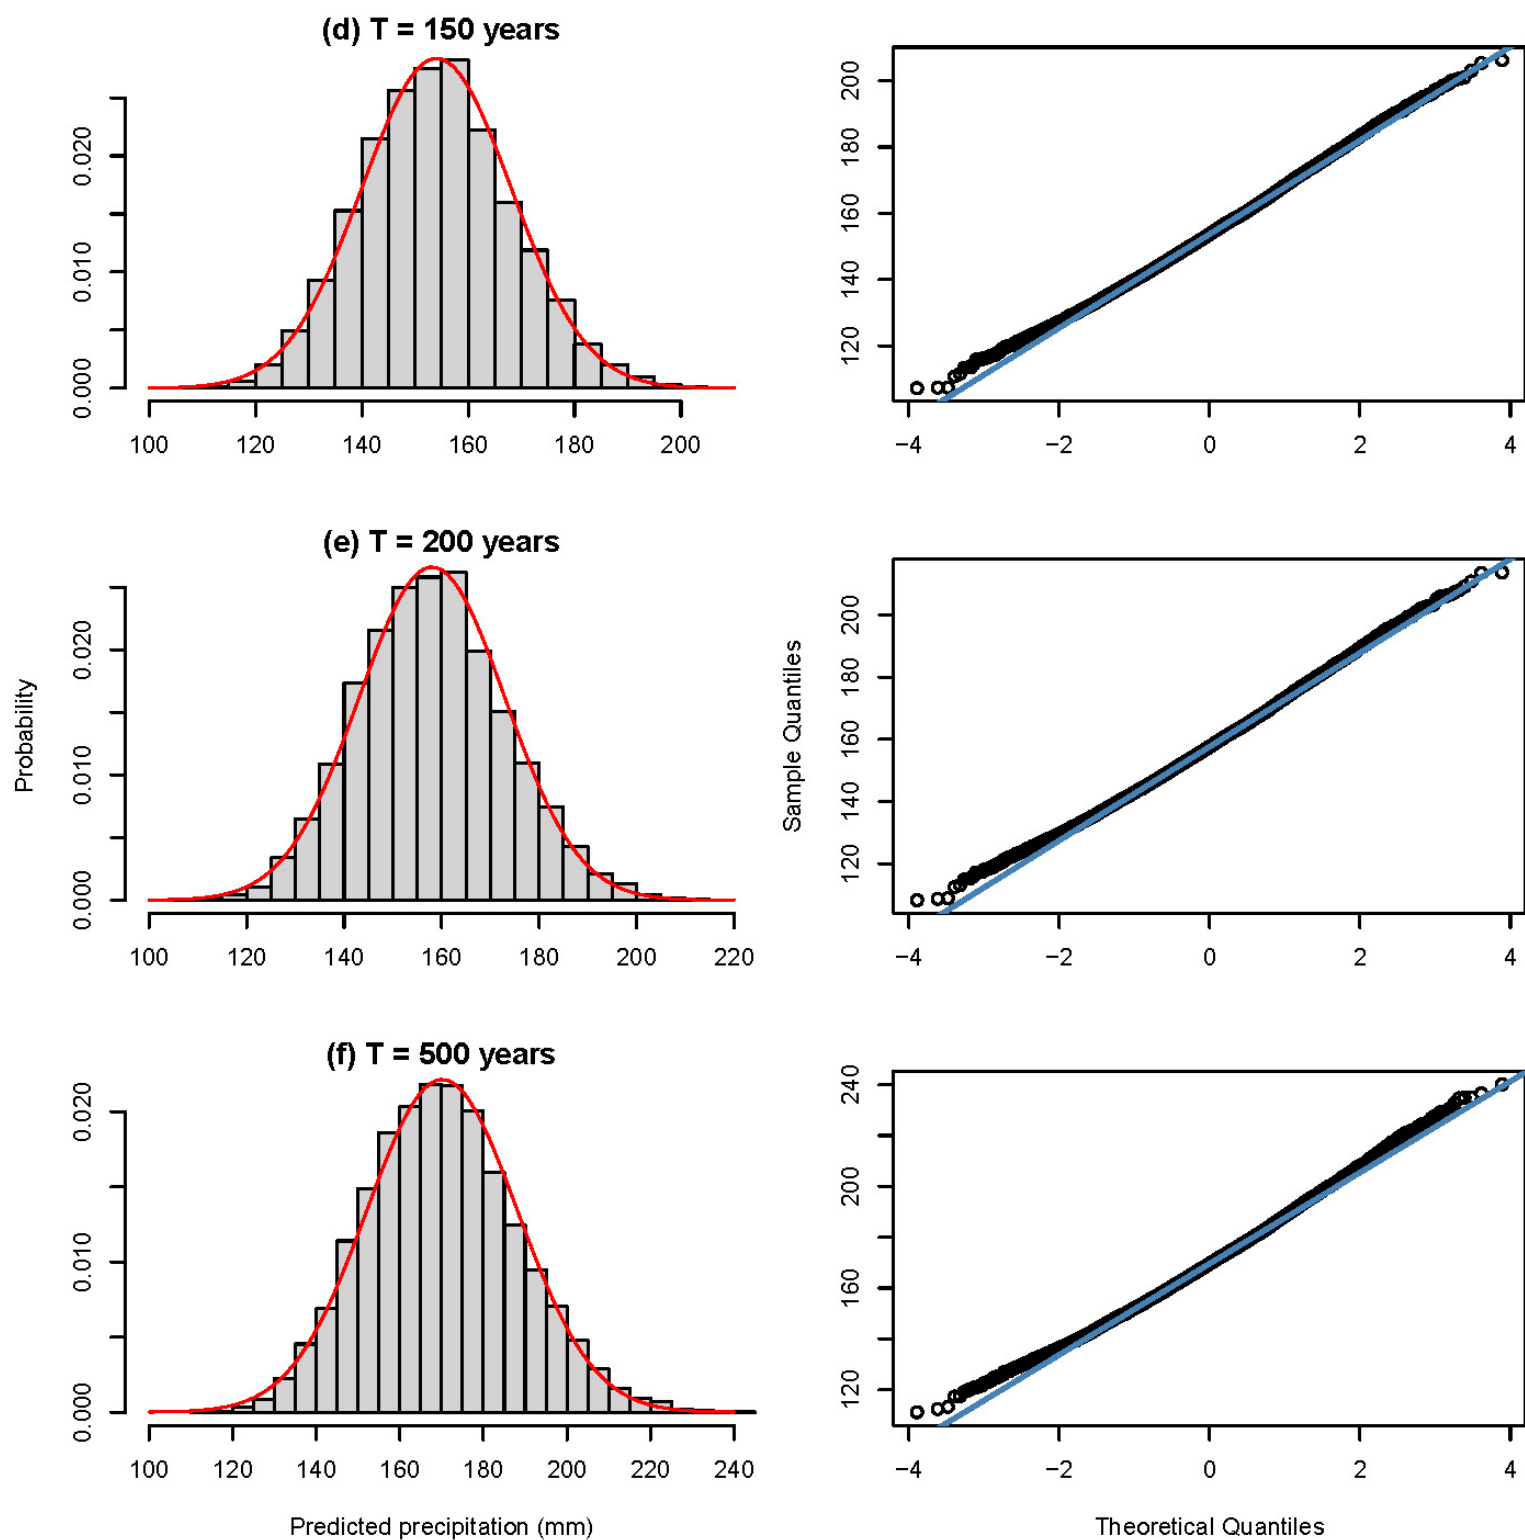

**Figure S1** histogram and normal Q-Q plots for of the bootstrap sampling distribution of extreme precipitation quantile for (a) 5- years, (b) 50- years, (c) 100- years, (d) 150- years, (e) 200- years and (f) 500-years return periods for station 17.

**(a) T = 5 years**

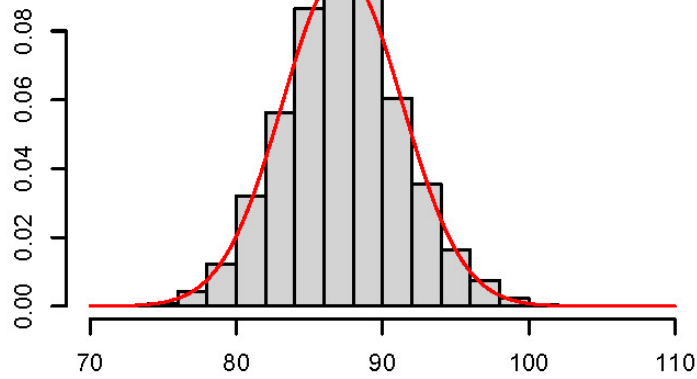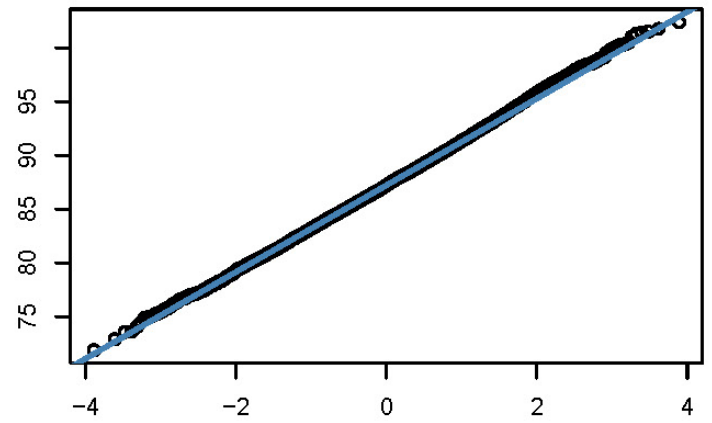

**(b) T = 50 years**

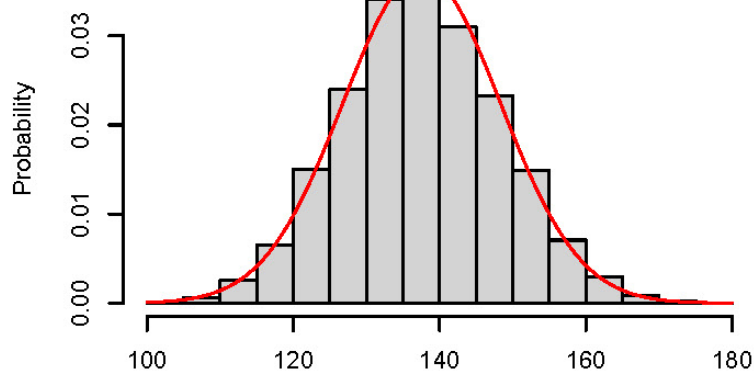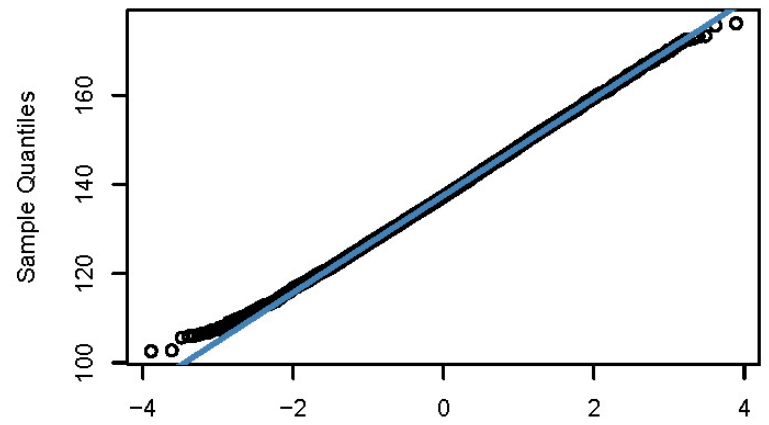

**(c) T = 100 years**

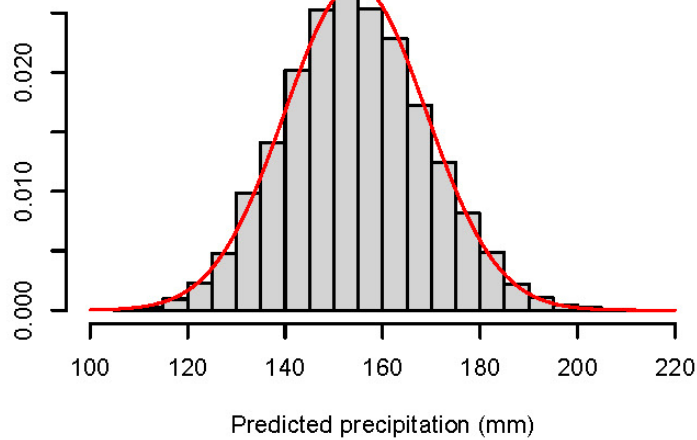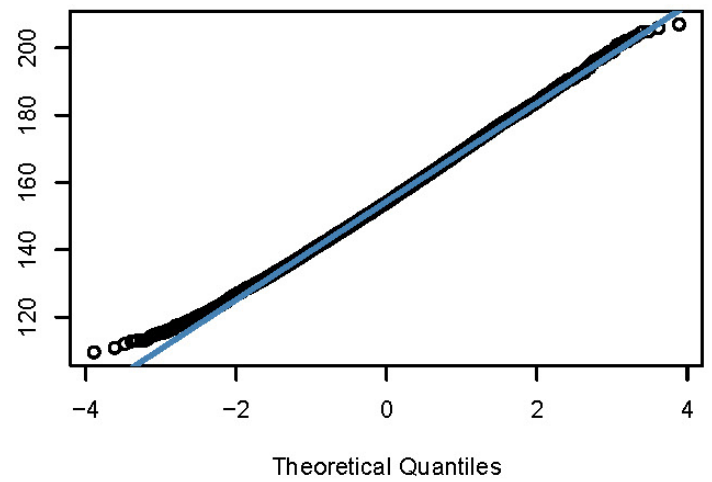

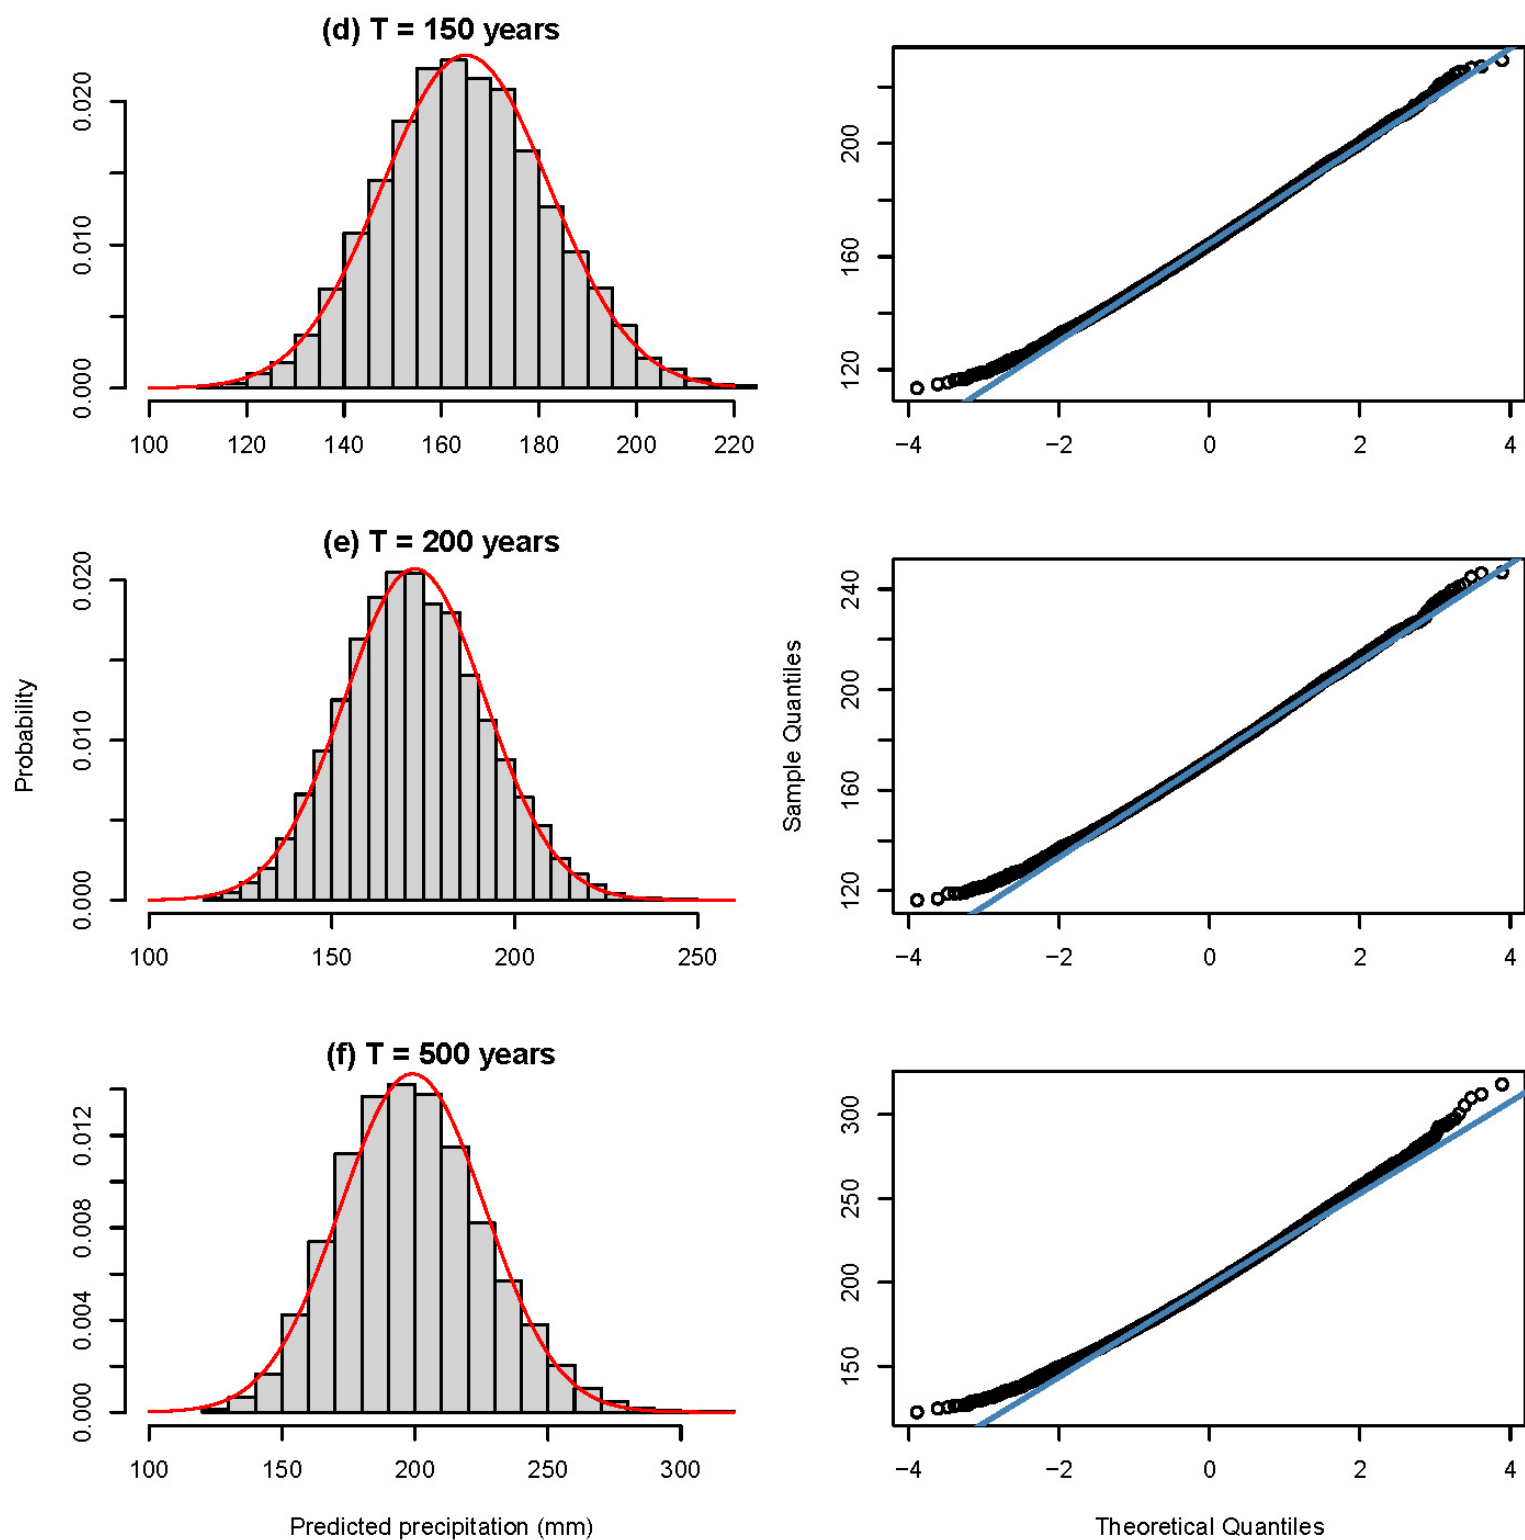

**Figure S2** histogram and normal Q-Q plots for of the bootstrap sampling distribution of extreme precipitation quantile for (a) 5- years, (b) 50- years, (c) 100- years, (d) 150- years, (e) 200- years and (f) 500-years return periods for station 18.



(a)  $T = 5$  years

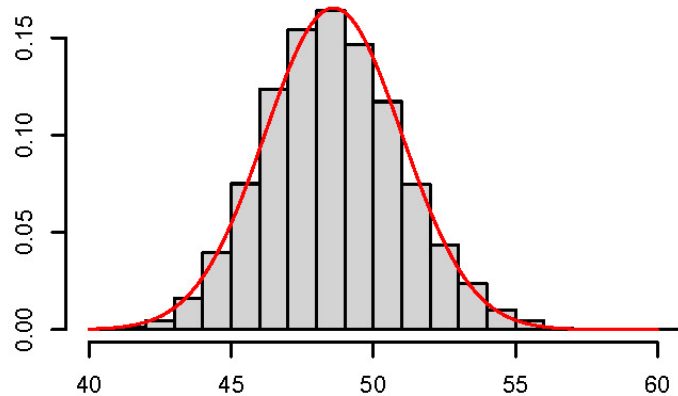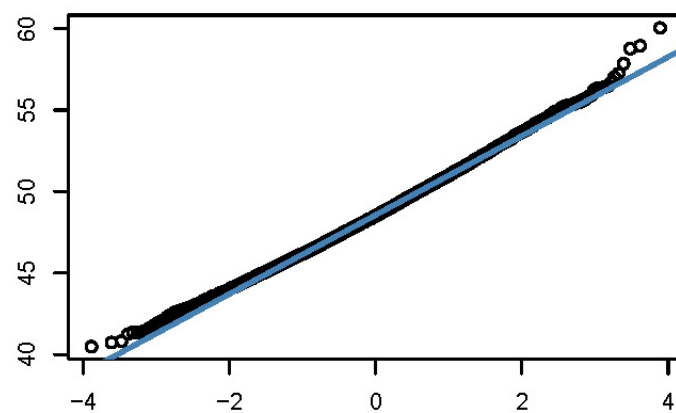

(b)  $T = 50$  years

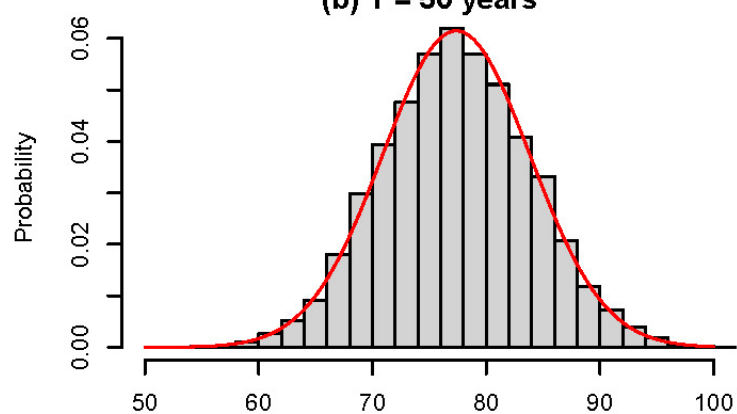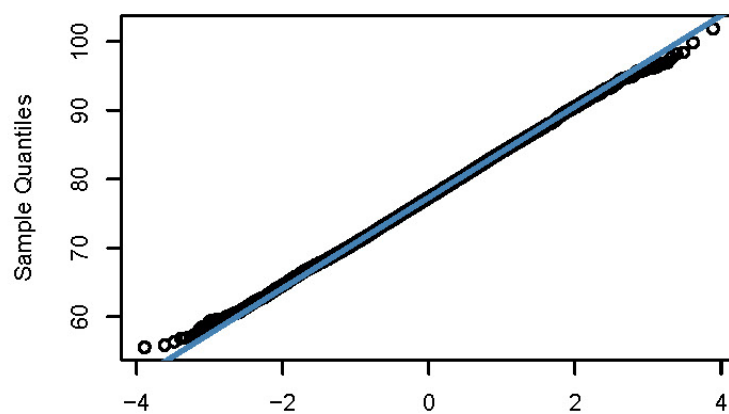

(c)  $T = 100$  years

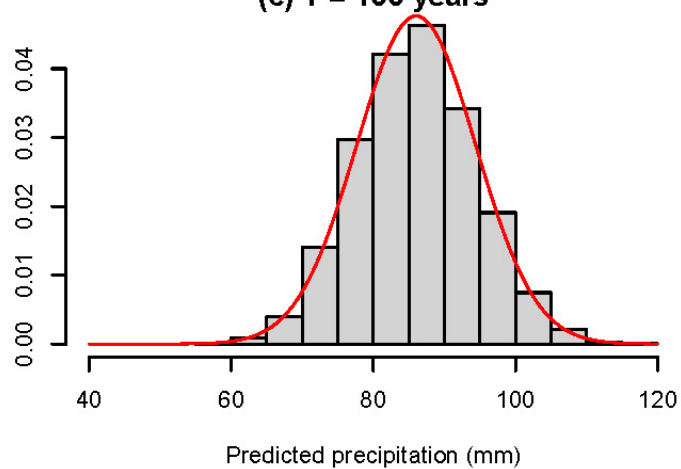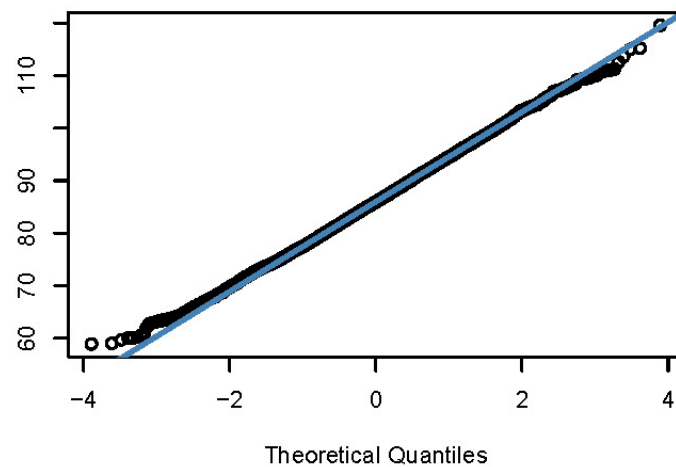

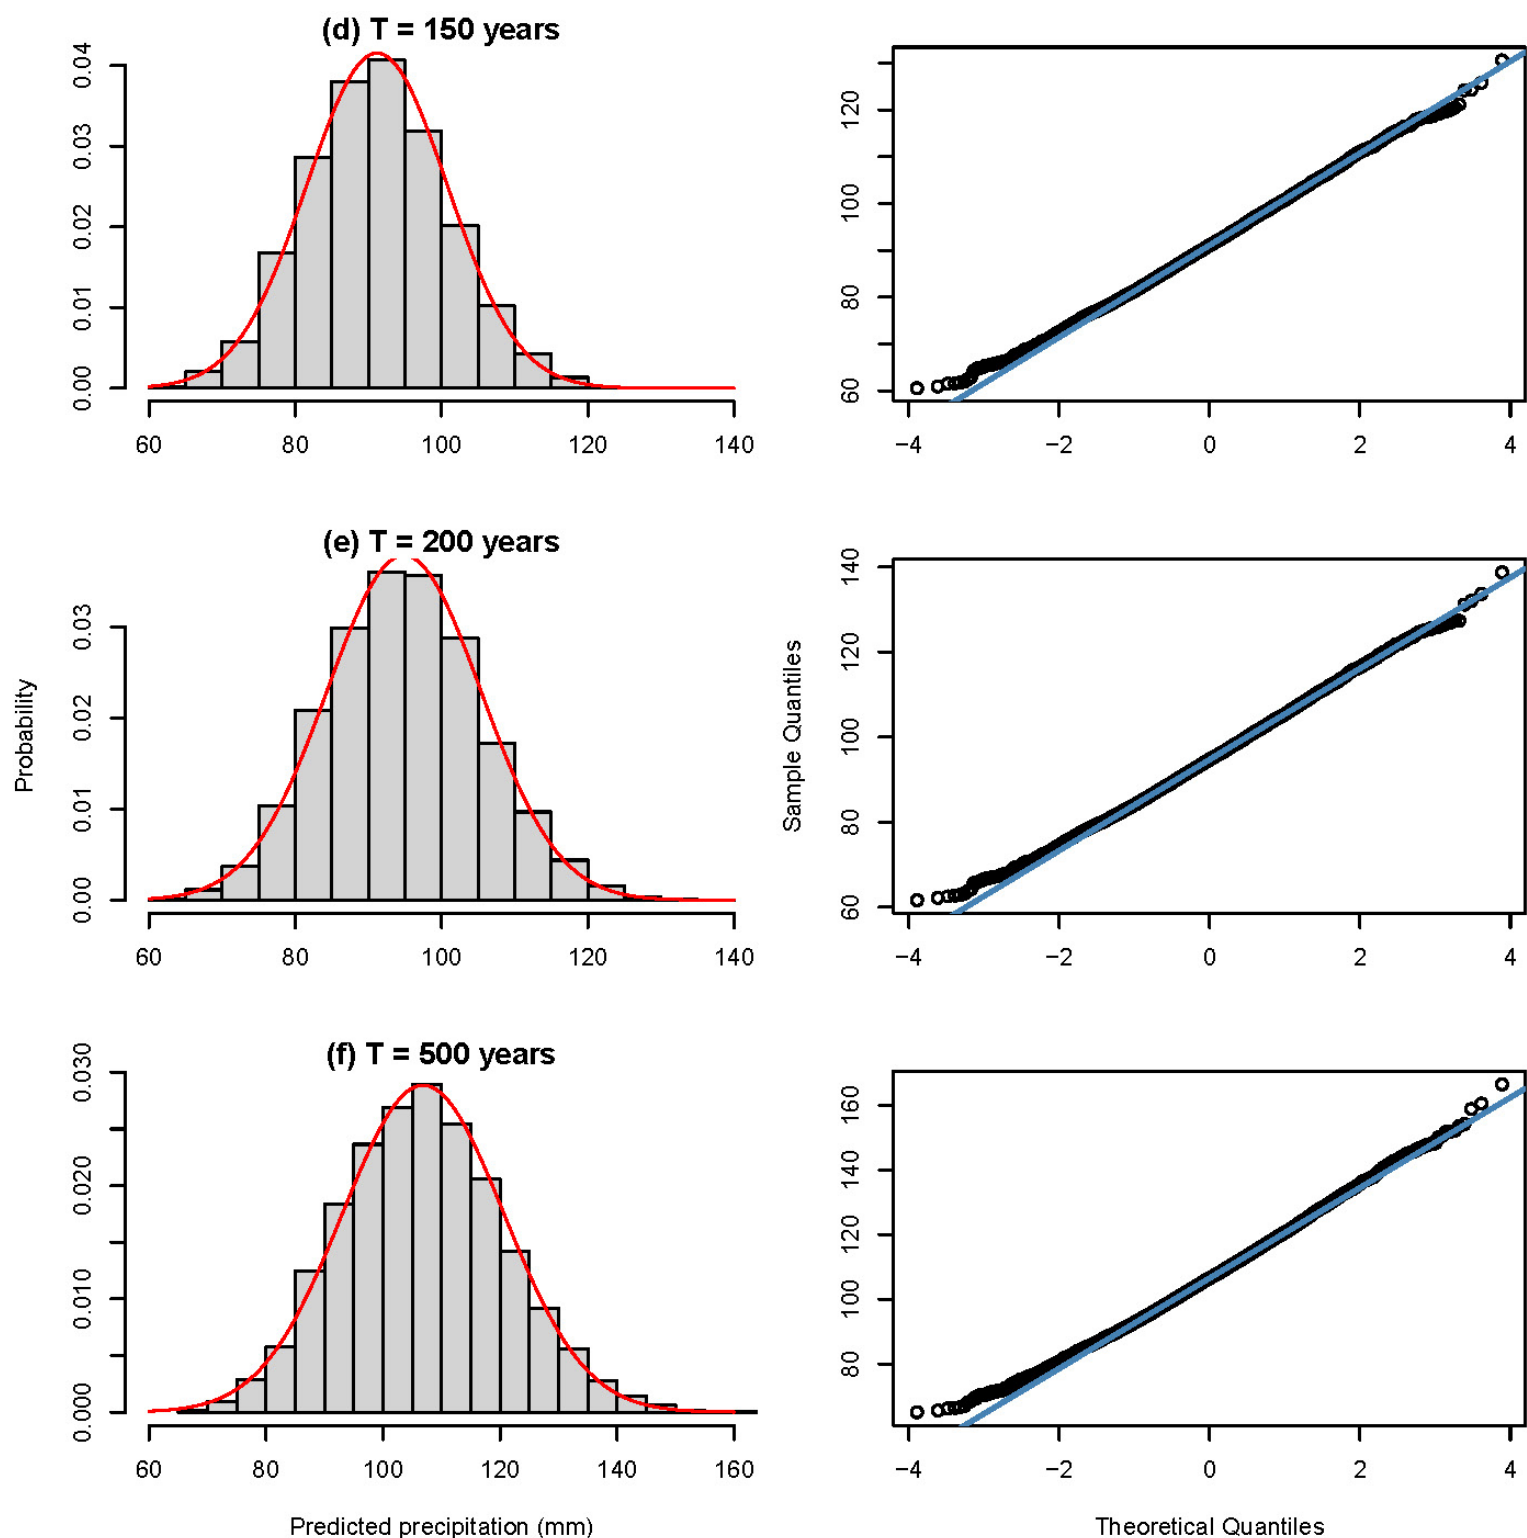

**Figure S3** histogram and normal Q-Q plots for of the bootstrap sampling distribution of extreme precipitation quantile for (a) 5- years, (b) 50- years, (c) 100- years, (d) 150- years, (e) 200- years and (f) 500-years return periods for station 19.
